# Supplementary material for: An Updated Systematic and Comprehensive Review of Cytoreductive Prostatectomy for Metastatic Prostate Cancer
Source: MDPI journal article supplement (doi:10.3390/curroncol30020170), 2023-02-10
Supplement: s1 [file s1]

## **Supplementary Information**

- 1. Supplementary Figure 1.** PRISMA checklist 2009
- 2. Supplementary Figure 2.** Risk of bias assessment of the included RCTs
- 3. Supplementary Table 1.** Risk of bias assessment for NRCTs (ROBINS-I)
- 4. Supplementary Table 2.** Patient characteristics of included population-based studies
- 5. Supplementary Table 3.** Patient characteristics of included case-control studies

## 2. Supplementary Figure 1. PRISMA checklist 2009

| Section/topic                      | #  | Checklist item                                                                                                                                                                                                                                                                                              | Reported on page #  |
|------------------------------------|----|-------------------------------------------------------------------------------------------------------------------------------------------------------------------------------------------------------------------------------------------------------------------------------------------------------------|---------------------|
| <b>TITLE</b>                       |    |                                                                                                                                                                                                                                                                                                             |                     |
| Title                              | 1  | Identify the report as a systematic review, meta-analysis, or both.                                                                                                                                                                                                                                         | 1                   |
| <b>ABSTRACT</b>                    |    |                                                                                                                                                                                                                                                                                                             |                     |
| Structured summary                 | 2  | Provide a structured summary including, as applicable: background; objectives; data sources; study eligibility criteria, participants, and interventions; study appraisal and synthesis methods; results; limitations; conclusions and implications of key findings; systematic review registration number. | 2                   |
| <b>INTRODUCTION</b>                |    |                                                                                                                                                                                                                                                                                                             |                     |
| Rationale                          | 3  | Describe the rationale for the review in the context of what is already known.                                                                                                                                                                                                                              | 5-7                 |
| Objectives                         | 4  | Provide an explicit statement of questions being addressed with reference to participants, interventions, comparisons, outcomes, and study design (PICOS).                                                                                                                                                  | 5-7                 |
| <b>METHODS</b>                     |    |                                                                                                                                                                                                                                                                                                             |                     |
| Protocol and registration          | 5  | Indicate if a review protocol exists, if and where it can be accessed (e.g., Web address), and, if available, provide registration information including registration number.                                                                                                                               | 8                   |
| Eligibility criteria               | 6  | Specify study characteristics (e.g., PICOS, length of follow-up) and report characteristics (e.g., years considered, language, publication status) used as criteria for eligibility, giving rationale.                                                                                                      | 8 and 9             |
| Information sources                | 7  | Describe all information sources (e.g., databases with dates of coverage, contact with study authors to identify additional studies) in the search and date last searched.                                                                                                                                  | 8 and 9             |
| Search                             | 8  | Present full electronic search strategy for at least one database, including any limits used, such that it could be repeated.                                                                                                                                                                               | 8 and 9             |
| Study selection                    | 9  | State the process for selecting studies (i.e., screening, eligibility, included in systematic review, and, if applicable, included in the meta-analysis).                                                                                                                                                   | 8 and 9<br>Figure.1 |
| Data collection process            | 10 | Describe method of data extraction from reports (e.g., piloted forms, independently, in duplicate) and any processes for obtaining and confirming data from investigators.                                                                                                                                  | 9 and 10            |
| Data items                         | 11 | List and define all variables for which data were sought (e.g., PICOS, funding sources) and any assumptions and simplifications made.                                                                                                                                                                       | 8 and 9             |
| Risk of bias in individual studies | 12 | Describe methods used for assessing risk of bias of individual studies (including specification of whether this was done at the study or outcome level), and how this information is to be used in any data synthesis.                                                                                      | 10                  |
| Summary measures                   | 13 | State the principal summary measures (e.g., risk ratio, difference in means).                                                                                                                                                                                                                               | 10                  |
| Synthesis of results               | 14 | Describe the methods of handling data and combining results of studies, if done, including measures of consistency (e.g., $I^2$ ) for each meta-analysis.                                                                                                                                                   | 10                  |

| Section/topic                 | #  | Checklist item                                                                                                                                                                                           | Reported on page #          |
|-------------------------------|----|----------------------------------------------------------------------------------------------------------------------------------------------------------------------------------------------------------|-----------------------------|
| Risk of bias across studies   | 15 | Specify any assessment of risk of bias that may affect the cumulative evidence (e.g., publication bias, selective reporting within studies).                                                             | 10                          |
| Additional analyses           | 16 | Describe methods of additional analyses (e.g., sensitivity or subgroup analyses, meta-regression), if done, indicating which were pre-specified.                                                         | None                        |
| <b>RESULTS</b>                |    |                                                                                                                                                                                                          |                             |
| Study selection               | 17 | Give numbers of studies screened, assessed for eligibility, and included in the review, with reasons for exclusions at each stage, ideally with a flow diagram.                                          | 12<br>Figure 1              |
| Study characteristics         | 18 | For each study, present characteristics for which data were extracted (e.g., study size, PICOS, follow-up period) and provide the citations.                                                             | 12<br>Table 1               |
| Risk of bias within studies   | 19 | Present data on risk of bias of each study and, if available, any outcome level assessment (see item 12).                                                                                                | 10<br>Supplementary Table 1 |
| Results of individual studies | 20 | For all outcomes considered (benefits or harms), present, for each study: (a) simple summary data for each intervention group (b) effect estimates and confidence intervals, ideally with a forest plot. | 12-14                       |
| Synthesis of results          | 21 | Present results of each meta-analysis done, including confidence intervals and measures of consistency.                                                                                                  | 12-14                       |
| Risk of bias across studies   | 22 | Present results of any assessment of risk of bias across studies (see Item 15).                                                                                                                          | 10<br>Supplementary Table 1 |
| Additional analysis           | 23 | Give results of additional analyses, if done (e.g., sensitivity or subgroup analyses, meta-regression [see Item 16]).                                                                                    | None                        |
| <b>DISCUSSION</b>             |    |                                                                                                                                                                                                          |                             |
| Summary of evidence           | 24 | Summarize the main findings including the strength of evidence for each main outcome; consider their relevance to key groups (e.g., healthcare providers, users, and policy makers).                     | 16-19                       |
| Limitations                   | 25 | Discuss limitations at study and outcome level (e.g., risk of bias), and at review-level (e.g., incomplete retrieval of identified research, reporting bias).                                            | 18 and 19                   |
| Conclusions                   | 26 | Provide a general interpretation of the results in the context of other evidence, and implications for future research.                                                                                  | 19 and 20                   |
| <b>FUNDING</b>                |    |                                                                                                                                                                                                          |                             |
| Funding                       | 27 | Describe sources of funding for the systematic review and other support (e.g., supply of data); role of funders for the systematic review.                                                               | 20,21                       |

**2. Supplementary Figure 2.** Risk of bias assessment of the included RCTs; (A) Risk of bias summary, (B) Risk of bias graph

(A)

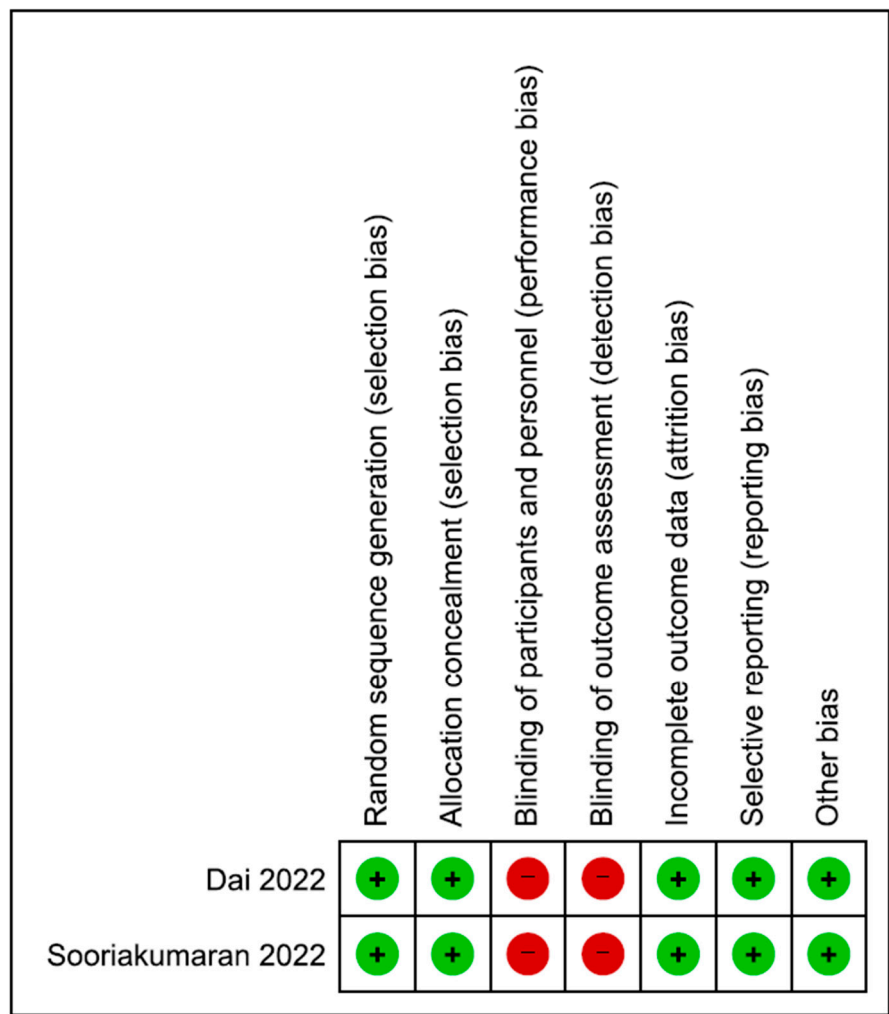

(B)

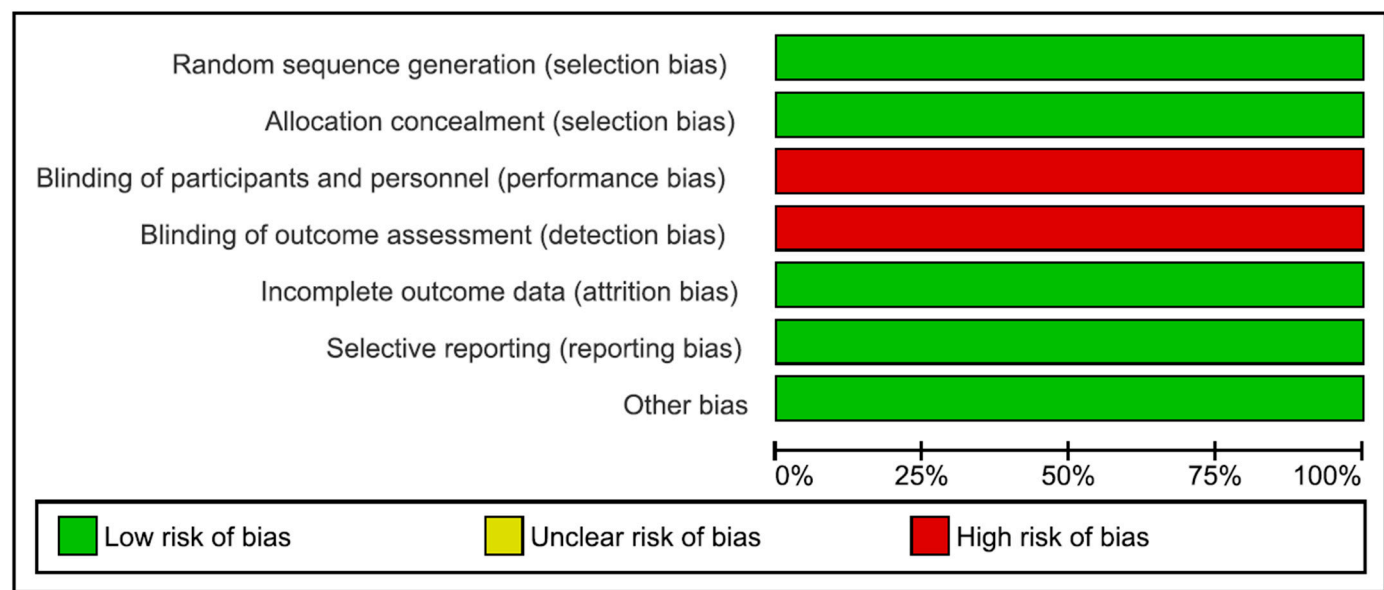

### 3. Supplementary Table 1. Risk of bias assessment for NRCTs (ROBINS-I)

| <b>Supplementary Table.1 Risk of bias assessment for NRCTs (ROBINS-I)</b> |             |                    |                                |                                        |                                              |                     |                                |                                         |                |
|---------------------------------------------------------------------------|-------------|--------------------|--------------------------------|----------------------------------------|----------------------------------------------|---------------------|--------------------------------|-----------------------------------------|----------------|
| <b>Authors</b>                                                            | <b>Year</b> | <b>Confounding</b> | <b>Participants' selection</b> | <b>Classification of interventions</b> | <b>Deviations from intended intervention</b> | <b>Missing data</b> | <b>Measurement of outcomes</b> | <b>Selection of the reported result</b> | <b>Overall</b> |
| <i><b>Population-based study</b></i>                                      |             |                    |                                |                                        |                                              |                     |                                |                                         |                |
| <b>Culp</b>                                                               | 2014        | Moderate           | Moderate                       | Low                                    | Low                                          | Low                 | Moderate                       | Low                                     | Moderate       |
| <b>Gratzke</b>                                                            | 2014        | Moderate           | Moderate                       | Low                                    | Low                                          | Low                 | Moderate                       | Low                                     | Moderate       |
| <b>Antwi</b>                                                              | 2014        | Moderate           | Moderate                       | Low                                    | Low                                          | Low                 | Moderate                       | Low                                     | Moderate       |
| <b>Satkunasivam</b>                                                       | 2015        | Moderate           | Moderate                       | Low                                    | Low                                          | Low                 | Moderate                       | Low                                     | Moderate       |
| <b>Parikh</b>                                                             | 2017        | Moderate           | Moderate                       | Low                                    | Low                                          | Low                 | Moderate                       | Low                                     | Moderate       |
| <b>Jin S</b>                                                              | 2020        | Moderate           | Moderate                       | Low                                    | Low                                          | Low                 | Moderate                       | Low                                     | Moderate       |
| <b>Jin K</b>                                                              | 2020        | Moderate           | Moderate                       | Low                                    | Low                                          | Low                 | Moderate                       | Low                                     | Moderate       |
| <b>Guo</b>                                                                | 2021        | Moderate           | Moderate                       | Low                                    | Low                                          | Low                 | Moderate                       | Low                                     | Moderate       |
| <b>Stolzenbach</b>                                                        | 2021        | Moderate           | Moderate                       | Low                                    | Low                                          | Low                 | Moderate                       | Low                                     | Moderate       |
| <i><b>Case-control or single arm study</b></i>                            |             |                    |                                |                                        |                                              |                     |                                |                                         |                |
| <b>Heidenreich</b>                                                        | 2015        | Moderate           | Moderate                       | Moderate                               | Low                                          | Moderate            | Low                            | Low                                     | Moderate       |
| <b>Gandaglia</b>                                                          | 2017        | Moderate           | Moderate                       | Moderate                               | Low                                          | Moderate            | Low                            | Low                                     | Moderate       |
| <b>Poelaert</b>                                                           | 2017        | Moderate           | Moderate                       | Moderate                               | Low                                          | Moderate            | Moderate                       | Low                                     | Moderate       |
| <b>Moschini</b>                                                           | 2017        | Moderate           | Moderate                       | Moderate                               | Low                                          | Moderate            | Moderate                       | Low                                     | Moderate       |
| <b>Steuber</b>                                                            | 2017        | Moderate           | Moderate                       | Moderate                               | Low                                          | Moderate            | Moderate                       | Moderate                                | Moderate       |
| <b>Buelens</b>                                                            | 2022        | Moderate           | Moderate                       | Moderate                               | Low                                          | Moderate            | Moderate                       | Low                                     | Moderate       |
| <b>Mistretta</b>                                                          | 2022        | Moderate           | Moderate                       | Moderate                               | Low                                          | Moderate            | Moderate                       | Low                                     | Moderate       |
| <b>Knipper</b>                                                            | 2020        | Moderate           | Moderate                       | Moderate                               | Low                                          | Moderate            | Low                            | Low                                     | Moderate       |
| <b>Lumen</b>                                                              | 2021        | Moderate           | Moderate                       | Moderate                               | Low                                          | Moderate            | Moderate                       | Low                                     | Moderate       |
| <b>Chaloupka</b>                                                          | 2021        | Moderate           | Moderate                       | Moderate                               | Low                                          | Moderate            | Low                            | Low                                     | Moderate       |

|                                                                                                                      |      |          |          |     |     |          |          |          |          |
|----------------------------------------------------------------------------------------------------------------------|------|----------|----------|-----|-----|----------|----------|----------|----------|
| Heidenreich                                                                                                          | 2018 | Moderate | Low      | Low | Low | Moderate | Low      | Low      | Moderate |
| Xue                                                                                                                  | 2020 | Moderate | Low      | Low | Low | Moderate | Moderate | Low      | Moderate |
| Mandel                                                                                                               | 2021 | Moderate | Low      | Low | Low | Moderate | Moderate | Low      | Moderate |
| Babst                                                                                                                | 2021 | Moderate | Low      | Low | Low | Moderate | Low      | Moderate | Moderate |
| Kim                                                                                                                  | 2022 | Moderate | Moderate | Low | Low | Moderate | Moderate | Low      | Moderate |
| Takagi                                                                                                               | 2022 | Moderate | Moderate | Low | Low | Moderate | Moderate | Low      | Moderate |
| <b>NRCTs: non-randomized comparative studies, ROBINS-I: Risk Of Bias In Non-Randomized Studies -of Interventions</b> |      |          |          |     |     |          |          |          |          |

#### 4. Supplementary Table 2. Patient characteristics of included population-based studies

| Supplementary Table 2. Patient characteristics of included population-based studies |      |             |                 |                  |                               |                                   |                                                           |                                                      |                                                                      |                                                         |                                                    |                                 |            |                      |  |
|-------------------------------------------------------------------------------------|------|-------------|-----------------|------------------|-------------------------------|-----------------------------------|-----------------------------------------------------------|------------------------------------------------------|----------------------------------------------------------------------|---------------------------------------------------------|----------------------------------------------------|---------------------------------|------------|----------------------|--|
| Author                                                                              | Year | Comparisons | No. of patients | Recruitment year | Age at local treatment, years | Performance status or comorbidity | cTstage, n (%)                                            | cNstage, n (%)                                       | Biopsy Gleason score*, n (%)                                         | PSA (ng/ml) or n (%)                                    | Metastatic site, n (%)                             | Detailed metastatic site, n (%) | ADT, n (%) | EBRT received, n (%) |  |
| Culp (SEER)                                                                         | 2014 | NLT         | 7811            | 2004-2010        | Median (IQR): 72 (63-80)      | ND                                | T1/T2: 4318 (55)<br>T3/T4: 1562 (20)<br>Unknown: 1931(25) | N0: 3807 (49)<br>N1: 1514 (19)<br>Unknown: 2490 (32) | Well to moderate: 439 (5.6)<br>Poor: 5673 (73)<br>Unknown: 1699 (22) | <10/10-19/20-29/>30: 632(8.1)/871(11)/558(7.1)/4815(62) | M1a: 463 (5.9)<br>M1b: 5469 (70)<br>M1c: 1879 (24) | ND                              | ND         | 0                    |  |
|                                                                                     |      | cRP         | 245             |                  | Median (IQR): 62 (58-67)      |                                   | T1/T2: 130 (53)<br>T3/T4: 113 (46)<br>Unknown: 2 (0.8)    | N0: 165 (67)<br>N1: 68 (28)<br>Unknown: 12 (32)      | Well to moderate: 51 (21)<br>Poor: 187 (76)<br>Unknown: 7 (2.9)      | <10/10-19/20-29/>30: 115(47)/50(20)/17(6.9)/32(13)      | M1a: 24 (9.8)<br>M1b: 150 (61)<br>M1c: 71 (29)     |                                 |            | 41 (17)              |  |
|                                                                                     |      | BT          | 129             |                  | Median (IQR): 68 (61-74)      |                                   | T1/T2: 91 (71)<br>T3/T4: 20 (16)<br>Unknown: 18 (14)      | N0: 3807 (49)<br>N1: 1514 (19)<br>Unknown: 18 (14)   | Well to moderate: 24 (19)<br>Poor: 94 (73)<br>Unknown: 18 (14)       | <10/10-19/20-29/>30: 45(35)/19(15)/11(8.5)/44 (34)      | M1a: 16 (12)<br>M1b: 75 (58)<br>M1c: 38 (30)       |                                 |            | 54 (42)              |  |

|                                                     |          |     |      |               |                                              |    |    |              |                                                                                                      |                                 |                                                                      |    |    |            |
|-----------------------------------------------------|----------|-----|------|---------------|----------------------------------------------|----|----|--------------|------------------------------------------------------------------------------------------------------|---------------------------------|----------------------------------------------------------------------|----|----|------------|
|                                                     |          |     |      |               |                                              |    |    | 2490<br>(32) | wn: 11<br>(8.5)                                                                                      |                                 |                                                                      |    |    |            |
| <b>Gratzke<br/>(Munich<br/>Cancer<br/>Registry)</b> | 20<br>14 | NLT | 1075 | 1998-<br>2010 | ND                                           | ND | ND | ND           | ND                                                                                                   | ND                              | ND                                                                   | ND | ND | ND         |
|                                                     |          | cRP | 74   |               |                                              |    |    |              |                                                                                                      |                                 |                                                                      |    |    |            |
|                                                     |          | RT  | 389  |               |                                              |    |    |              |                                                                                                      |                                 |                                                                      |    |    |            |
| <b>Antwi<br/>(SEER)</b>                             | 20<br>14 | NLT | 7516 | 2004-<br>2010 | <65:<br>2305<br>(31)<br>>65:<br>5211<br>(69) | ND | ND | ND           | Well<br>to<br>moder<br>ate:<br>391<br>(5.2)<br>Poor:<br>5433<br>(72)<br>Unkno<br>wn:<br>1692<br>(23) | <10: 89 (1.2)<br>>10: 6805 (91) | M1a:<br>433<br>(5.8)<br>M1b:<br>5264<br>(70)<br>M1c:<br>1819<br>(24) | ND | ND | 0          |
|                                                     |          | cRP | 222  |               | <65:<br>142<br>(64)<br>>65:<br>80 (36)       |    |    |              | Well<br>to<br>moder<br>ate: 39<br>(17)<br>Poor:<br>175<br>(79)<br>Unkno<br>wn: 8<br>(3.6)            | <10: 10 (4.5)<br>>10: 195 (88)  | M1a:<br>20<br>(9.0)<br>M1b:<br>139<br>(63)<br>M1c:<br>63<br>(28)     |    |    | 34<br>(15) |
|                                                     |          | BT  | 120  |               | <65:<br>40 (33)<br>>65:<br>80 (67)           |    |    |              | Well<br>to<br>moder<br>ate: 22<br>(18)<br>Poor:<br>85 (71)<br>Unkno                                  | <10: 4 (3.3)<br>>10: 109 (91)   | M1a:<br>18<br>(15)<br>M1b:<br>68<br>(57)<br>M1c:<br>34<br>(28)       |    |    | 51<br>(42) |



|                            |      |      |      |           |                      |                                                    |                                                                              |                                                               |                                                   |                                                    |                                                       |    |                                                                          |    |
|----------------------------|------|------|------|-----------|----------------------|----------------------------------------------------|------------------------------------------------------------------------------|---------------------------------------------------------------|---------------------------------------------------|----------------------------------------------------|-------------------------------------------------------|----|--------------------------------------------------------------------------|----|
|                            |      |      |      |           |                      |                                                    |                                                                              |                                                               | wn: 13<br>(11)                                    |                                                    |                                                       |    |                                                                          |    |
| <b>Satkunasivam (SEER)</b> | 2015 | NLT  | 3827 | 2004-2009 | Mean±SD:<br>78.2±7.2 | CCI<br>0/1/2/3<:<br>2462(64)/757(20)/331(9)/277(7) | T1/T2:<br>839(22)/1282(33)<br>T3/T4: 298(8)/461 (12)<br>Unknown:<br>947 (25) | N0:<br>1930(50)<br>N1:<br>577(15)<br>Unkno<br>wn:<br>1320(34) | <6:<br>167 (4)<br>7: 569(15)<br>8-10:<br>2042(53) | Mean±SD: 590±380                                   | M1a:<br>190(5)<br>M1b:<br>2570(67)<br>M1c:<br>922(24) | ND | None:<br>1132(30)<br>Orchiectomy:<br>331(9)<br>GnRH agonist:<br>2330(61) | ND |
|                            |      | cRP  | 47   |           | Mean±SD:<br>73.0±6.0 | CCI<br>0/1/2/3<:<br>32(68)/9(19)/4(9)/2(4)         | T1/T2:<br>0/21(45)<br>T3/T4: 19(40)/6 (13)<br>Unknown:<br>1(2)               | N0: 34(72)<br>N1: 10(21)<br>Unkno<br>wn: 3(6)                 | <6: 5(11)<br>7: 22(47)<br>8-10:<br>19 (40)        | Mean±SD: 181±263                                   | M1a:<br>3(6)<br>M1b:<br>26(55)<br>M1c:<br>17(36)      |    | None: 27(57)<br>Orchiectomy: 3(6)<br>GnRH agonist:<br>16 (34)            |    |
|                            |      | IMRT | 88   |           | Mean±SD:<br>74.2±6.1 | CCI<br>0/1/2/3<:<br>60(68)/19(22)/4(5)/5(6)        | T1/T2:<br>27(31)/36(41)<br>T3/T4: 10(11)/9 (10)<br>Unknown:<br>6(7)          | N0: 59(67)<br>N1: 11(13)<br>Unkno<br>wn: 18(20)               | <6: 10(11)<br>7: 24(27)<br>8-10:<br>43 (49)       | Mean±SD: 282±338                                   | M1a: 4(5)<br>M1b:<br>65(74)<br>M1c:<br>16(18)         |    | None: 30(34)<br>Orchiectomy: 0<br>GnRH agonist:<br>56 (64)               |    |
|                            |      | CRT  | 107  |           | Mean±SD:<br>76.4±6.3 | CCI<br>0/1/2/3<:<br>67(63)/25(23)/10(9)/5(5)       | T1/T2:<br>31(29)/28(26)<br>T3/T4: 9(8)/17 (16)<br>Unknown:<br>22(21)         | N0: 63(59)<br>N1: 15(14)<br>Unkno<br>wn: 29(27)               | <6: 8(7)<br>7: 22(21)<br>8-10:<br>59 (55)         | Mean±SD: 531±369                                   | M1a: 4(4)<br>M1b:<br>72(67)<br>M1c:<br>31(29)         |    | None: 13(12)<br>Orchiectomy: 5(5)<br>GnRH agonist:<br>88 (82)            |    |
| <b>Parikh (NCDB)</b>       | 2017 | NLT  | 5224 | 2004-2013 | Median : 72          | CCI<br>0/1-2/3<:<br>3803(73)/1001(19)/420(8.0)     | T1/T2:<br>1404(27)/855(16)<br>T3/T4:<br>560(11)/1039                         | N0:<br>2164(42)<br>N1:<br>1087                                | <6: 33(0.6)<br>7: 214(4.0)<br>8-10:               | <10: 81 (4.1)<br>11-20: 72 (4.0)<br>>20: 1834 (92) | M1a:<br>12(0.2)<br>M1b:<br>2286                       | ND | None: 9(5.1)<br>Yes: 169(95)                                             | ND |

|              |      |      |      |           |                          |                                       |                                                                        |                                                      |                                                 |                                                          |                                                   |                                                        |    |    |
|--------------|------|------|------|-----------|--------------------------|---------------------------------------|------------------------------------------------------------------------|------------------------------------------------------|-------------------------------------------------|----------------------------------------------------------|---------------------------------------------------|--------------------------------------------------------|----|----|
| Jin S (SEER) | 2020 |      |      | 2010-2014 | Median (IQR): 70 (62-78) |                                       | (20) Unknown: 1366 (26)                                                | (21) Unknown: 1889 (37)                              | 4969 (95)                                       |                                                          | (44) M1c: 334 (6.7)                               | Bone: 4888 (87)<br>Liver: 237 (4.2)<br>Lung: 421 (7.5) | ND | ND |
|              |      | cRP  | 622  |           |                          | CCI 0/1-2/3<: 492(79)/107(17)/23(3.7) | T1/T2: 195(31)/135(22)<br>T3/T4: 62(10)/46(7.4)<br>Unknown: 184 (30)   | N0: 323 (53)<br>N1: 62 (10)<br>Unknown: 228 (37)     | <6: 19 (3.1)<br>7: 67 (11)<br>8-10: 536 (86)    | <10: 17 (4.2)<br>11-20: 16 (3.9)<br>>20: 373 (92)        | M1a: 1(0.2)<br>M1b: 168 (28)<br>M1c: 15 (2.5)     |                                                        |    |    |
|              |      | CRT  | 153  |           |                          | CCI 0/1-2/3<: 125(82)/18(12)/10(6.5)  | T1/T2: 40(26)/21(14)<br>T3/T4: 21(14)/48(31)<br>Unknown: 23 (15)       | N0: 70 (46)<br>N1: 41 (27)<br>Unknown: 40 (26)       | <6: 1 (0.7)<br>7: 4 (2.6)<br>8-10: 148 (97)     | <10: 2 (2.5)<br>11-20: 5 (6.2)<br>>20: 74 (91)           | M1a: 0<br>M1b: 55 (36)<br>M1c: 10 (6.6)           |                                                        |    |    |
|              |      | IMRT | 52   |           |                          | CCI 0/1-2/3<: 41(79)/6(12)/5(9.6)     | T1/T2: 11(21)/12(23)<br>T3/T4: 8(15)/20(38)<br>Unknown: 1 (1.9)        | N0: 33 (63)<br>N1: 8 (15)<br>Unknown: 11 (21)        | <6: 0<br>7: 2 (3.9)<br>8-10: 50 (96)            | <10: 2 (5.7)<br>11-20: 2 (5.7)<br>>20: 31 (89)           | M1a: 0<br>M1b: 28 (54)<br>M1c: 2 (3.9)            |                                                        |    |    |
|              |      | NLT  | 5628 |           |                          | ND                                    | T1/T2: 1469(26)/1757(31)<br>T3/T4: 616(11)/610(11)<br>Unknown: 66(1.2) | N0: 3035 (54)<br>N1: 1452 (26)<br>Unknown: 1141 (20) | <6: 124 (2.2)<br>7: 674 (12)<br>8-10: 3567 (63) | <10/10-19/20-29/>30: 429(7.6)/451(8.0)/348(6.2)/3813(68) | M1a: 371 (6.6)<br>M1b: 4078 (73)<br>M1c: 963 (17) |                                                        |    |    |
|              |      | cRP  | 159  |           | Median (IQR): 62 (57-67) |                                       | T1/T2: 7(4.4)/51(32)<br>T3/T4: 88(55)/9(5.7)                           | N0: 99 (62)<br>N1: 55 (35)<br>Unknown                | <6: 13 (8.2)<br>7: 54 (34)                      | <10/10-19/20-29/>30: 86(54)/30(19)/12(7.5)/20(13)        | M1a: 20 (13)<br>M1b: 105                          | Bone: 114 (72)<br>Liver: 6 (3.8)                       |    |    |

|                         |          |     |           |               |                                    |    |                                                                                             |                                                                            |                                                                     |                                                        |                                                                        |                                                              |    |    |
|-------------------------|----------|-----|-----------|---------------|------------------------------------|----|---------------------------------------------------------------------------------------------|----------------------------------------------------------------------------|---------------------------------------------------------------------|--------------------------------------------------------|------------------------------------------------------------------------|--------------------------------------------------------------|----|----|
|                         |          |     |           |               |                                    |    | Unknown:<br>4(2.5)                                                                          | wn: 5<br>(3.1)                                                             | 8-10:<br>76 (48)                                                    |                                                        | (66)<br>M1c:<br>28<br>(18)                                             | Lung:<br>10<br>(6.3)                                         |    |    |
|                         |          | BT  | 62        |               | Median<br>(IQR):<br>65 (56-<br>70) |    | T1/T2:<br>30(48)/14(23<br>)<br>T3/T4:<br>3(4.8)/4(6.5)<br>Unknown:<br>11(18)                | N0: 44<br>(71)<br>N1: 8<br>(13)<br>Unkno<br>wn: 10<br>(16)                 | <6: 8<br>(13)<br>7: 14<br>(23)<br>8-10:<br>32 (52)                  | <10/10-19/20-29/>30:<br>21(34)/7(11)/4(6.5)/24(3<br>9) | M1a: 4<br>(6.5)<br>M1b:<br>44<br>(71)<br>M1c:<br>11<br>(18)            | Bone:<br>48<br>(77)<br>Liver:<br>2 (3.2)<br>Lung:<br>1 (1.6) |    |    |
| <b>Jin K<br/>(SEER)</b> | 20<br>20 | NLT | 1885<br>7 | 2004-<br>2015 | Mean±<br>SD:<br>71.5±1<br>1.0      | ND | T1/T2:<br>4760(25)/583<br>9(31)<br>T3/T4:<br>1679(8.9)/23<br>26(12)<br>Unknown:<br>4253(23) | N0:<br>9682<br>(51)<br>N1:<br>4307<br>(23)<br>Unkno<br>wn:<br>4868<br>(26) | <6:<br>845<br>(4.5)<br>7:<br>1421<br>(7.5)<br>8-10:<br>4578<br>(24) | Mean±SD:<br>67.8±36.6                                  | M1a:<br>1207<br>(6.4)<br>M1b:<br>13704<br>(73)<br>M1c:<br>3946<br>(21) | ND                                                           | ND | NA |
|                         |          | cRP | 435       |               | Mean±<br>SD:<br>62.8±8.<br>0       |    | T1/T2:<br>11(2.5)/153(<br>35)<br>T3/T4:<br>199(46)/64(1<br>5)<br>Unknown:<br>8(1.8)         | N0:<br>252<br>(58)<br>N1:<br>162<br>(37)<br>Unkno<br>wn: 21<br>(4.8)       | <6: 27<br>(6.2)<br>7: 58<br>(13)<br>8-10:<br>76 (17)                | Mean±SD:<br>19.4±23.7                                  | M1a:<br>58<br>(13)<br>M1b:<br>309<br>(71)<br>M1c:<br>68<br>(16)        |                                                              |    |    |
|                         |          | RT  | 320       |               | Mean±<br>SD:<br>67.7±1<br>0.0      |    | T1/T2:<br>119(37)/87(2<br>7)<br>T3/T4:<br>34(11)/26(8.<br>1)<br>Unknown:<br>54(17)          | N0:<br>210<br>(66)<br>N1: 41<br>(13)<br>Unkno<br>wn: 69<br>(22)            | <6: 30<br>(9.4)<br>7: 42<br>(13)<br>8-10:<br>83 (26)                | Mean±SD:<br>42.1±38.7                                  | M1a:<br>30<br>(9.4)<br>M1b:<br>217<br>(68)<br>M1c:<br>73<br>(23)       |                                                              |    |    |

|                                    |          |     |                    |               |                                    |    |                                                                   |                                              |                                                                                                                                      |                                   |                                                                |    |    |    |
|------------------------------------|----------|-----|--------------------|---------------|------------------------------------|----|-------------------------------------------------------------------|----------------------------------------------|--------------------------------------------------------------------------------------------------------------------------------------|-----------------------------------|----------------------------------------------------------------|----|----|----|
| <b>Guo<br/>(SEER)</b>              | 20<br>21 | cRP | 481<br>(148)<br>** | 2004-<br>2016 | Median<br>(IQR):<br>65 (58-<br>69) | ND | T1/T2:<br>8(5.4)/86(58)<br>T3/T4:<br>48(32)/6(4.1)                | ND                                           | <6: 15<br>(10)<br>7: 40<br>(27)<br>8-10:<br>93 (63)                                                                                  | Median (IQR): 16.6 (6.3-<br>31.0) | M1a:<br>26<br>(18)<br>M1b:<br>94<br>(64)<br>M1c:<br>28<br>(19) | ND | ND | ND |
|                                    |          | RT  | 203<br>(148)<br>** |               | Median<br>(IQR):<br>65 (56-<br>72) |    | T1/T2:<br>18(12)/72(49<br>)<br>T3/T4:<br>48(32)/10(6.<br>8)       |                                              | <6: 18<br>(12)<br>7: 40<br>(27)<br>8-10:<br>90 (61)                                                                                  | Median (IQR): 15.0 (5.8-<br>38.7) | M1a:<br>24<br>(16)<br>M1b:<br>94<br>(64)<br>M1c:<br>30<br>(20) |    |    |    |
| <b>Stolzenba<br/>ch<br/>(SEER)</b> | 20<br>21 | cRP | 954                | 2004-<br>2016 | Median<br>(IQR):<br>65 (59-<br>72) | ND | T1/T2: 534<br>(56)<br>T3/T4: 199<br>(21)<br>Unknown:<br>221 (23)  | N0/N<br>X: 620<br>(65)<br>N1:<br>334<br>(35) | I / II /<br>III/IV/<br>V:<br>39<br>(4.1)/<br>94(10)<br>/<br>85(8.9)<br>/<br>152(16<br>) / 339<br>(36)<br>Unkno<br>wn:<br>245<br>(26) | Median (IQR): 32.4 (9.2-<br>98)   | M1a:<br>114<br>(12)<br>M1b:<br>840<br>(88)                     | ND | ND | ND |
|                                    |          | RT  | 3326               |               | Median<br>(IQR):<br>67 (60-<br>76) |    | T1/T2: 1917<br>(58)<br>T3/T4: 768<br>(23)<br>Unknown:<br>641 (19) |                                              |                                                                                                                                      | Median (IQR): 97.9 (23-<br>98)    | M1a:<br>182<br>(5.5)<br>M1b:<br>3144<br>(94.5)                 |    |    |    |

|  |  |  |  |  |  |  |  |  |                                              |  |  |  |  |  |
|--|--|--|--|--|--|--|--|--|----------------------------------------------|--|--|--|--|--|
|  |  |  |  |  |  |  |  |  | 272(8.2)/637(19)/ 1353 (41) Unkown: 752 (23) |  |  |  |  |  |
|--|--|--|--|--|--|--|--|--|----------------------------------------------|--|--|--|--|--|

No.; Number, Pts.: Patients, NCDB; National Cancer Database, SEER; Surveillance, Epidemiology and End Results, LT; Local Therapy, NLT: No Local Therapy, RT; Radiotherapy, EBRT; External Beam Radiotherapy, BT; Brachytherapy, IMRT; Intensity-modulated Radiotherapy, CRT; Conformal Radiation Therapy, cRP; Cytoreductive Radical Prostatectomy, IQR; Interquartile range, SD; Standard Deviation, ADT; Androgen Deprivation Therapy, GnRH; Gonadotropin Releasing Hormone, NA; Not Applicable, ND; No Data, PSA; Prostate Specific Antigen, CCI; Charlson Comorbidity Index,

\*Before 2014, studies from SEER database described as differentiation.

\*\*Described as number of PSM cohorts

## 5. Supplementary Table 3. Patient characteristics of included case-control or single arm studies

| Supplementary Table 3. Patient characteristics of case-control or single arm studies |      |             |                 |                           |                                   |                                                       |                                                    |                                |                                         |                                            |                       |
|--------------------------------------------------------------------------------------|------|-------------|-----------------|---------------------------|-----------------------------------|-------------------------------------------------------|----------------------------------------------------|--------------------------------|-----------------------------------------|--------------------------------------------|-----------------------|
| Author                                                                               | Year | Comparisons | No. of patients | Age, years                | Performance status or comorbidity | cTstage, n (%)                                        | Biopsy Gleason score (Gleason group), n (%)        | PSA, ng/ml                     | Metastatic burden                       | Metastatic site, n (%)                     | Neoadjuvant HT, n (%) |
| <b><u>Comparative studies between cRP vs. No cRP</u></b>                             |      |             |                 |                           |                                   |                                                       |                                                    |                                |                                         |                                            |                       |
| Heidenreich                                                                          | 2015 | cRP         | 23              | Mean(range): 61 (42-69)   | CCI (mean, range): 6.6 (6-9)      | cT2: 7 (30)<br>cT3a/b: 16 (70)<br>cT4: 0              | 6/7/8/9/10: 0/5(22)/7(30)/7(30)/4(17)              | Mean(range): 135.2 (3.5-150.4) | Mean bone metastases (range): 2.1 (1-3) | LN: <2cm: 3 (13)<br>2-3cm: 1 (4.3)         | ND                    |
|                                                                                      |      | No cRP      | 38              | Mean(range): 63.9 (47-83) | CCI (mean, range): 7.1 (6-11)     | cT2: 10 (26)<br>cT3a/b: 24 (63)<br>cT4: 4 (11)        | 6/7/8/9/10: 4 (11)/11(29)/11(29)/8(21)/4(11)       | Mean(range): 105.9 (45-195)    | Mean bone metastases (range): 2.5 (1-5) | LN: <2cm: 6 (16)<br>2-3cm: 2 (5.3)         |                       |
| Poelaert (LoMP trial)                                                                | 2017 | cRP         | 17              | Mean±SD: 64±8             | ND                                | cT1-2: 8 (47)<br>cT3a/b: 2(12)/7(41)<br>cT4: 0        | 1/2/3/4/5: 0/2(12)/2(12)/5(29)/8(47)               | Mean(range): 16 (4.6-75)       | Low-volume: 16 (94)                     | M1a: 9 (53)<br>M1b: 8 (47)<br>M1c: 0       | ND                    |
|                                                                                      |      | No cRP      | 29              | Mean±SD: 72±10            |                                   | cT1-2: 3 (10)<br>cT3a/b: 10(35)/3(10)<br>cT4: 13 (45) | 1/2/3/4/5: 1(3.4)/0/1(3.4)/8(28)/19(66)            | Mean(range): 156 (5.2-3092)    | Low-volume: 9 (31)                      | M1a: 4 (14)<br>M1b: 21 (72)<br>M1c: 4 (14) |                       |
| Moschini                                                                             | 2017 | cRP         | 31              | Median (IQR): 62 (56-66)  | ND                                | <cT2: 13 (42)<br>cT3-T4: 18 (58)                      | 3+5/4+3/4+4/4+5/5+5 2(6.5)/0/10 (32)/15 (48)/4(13) | Median (IQR): 24 (12.4-107)    | ND                                      | M1a: 17 (55)<br>M1b: 14 (45)               | ND                    |
|                                                                                      |      | No cRP      | 16              | Median (IQR): 59 (54-59)  |                                   | <cT2: 12 (75)<br>cT3-T4: 2 (13)                       | 3+5/4+3/4+4/4+5/5+5 0/2(13)/5 (31)/8 (50)/1(6.3)   | Median (IQR): 76.5 (2.7-218)   |                                         | M1a: 8 (50)<br>M1b: 8 (50)                 |                       |

|                                  |      |        |    |                             |                                              |                                             |                                           |                                   |                                                                        |                                                                          |                                             |
|----------------------------------|------|--------|----|-----------------------------|----------------------------------------------|---------------------------------------------|-------------------------------------------|-----------------------------------|------------------------------------------------------------------------|--------------------------------------------------------------------------|---------------------------------------------|
| Steuber                          | 2017 | cRP    | 43 | Median: 65                  | ND                                           | <cT2: 46.5%<br>cT3a/b: 53.5%                | 6/7/8/9/10:<br>0/30%/30%/35%/4.7%         | Median:29                         | No. of bone metastasis<br>1/2/3:<br>67%/21%/12%                        | NA                                                                       | 44%                                         |
|                                  |      | No cRP | 40 | Median: 70                  |                                              | <cT2: 22.5%<br>cT3a/b: 77.5%                | 6/7/8/9/10:<br>2.5%/12.5%/32.5%/40%/12.5% | Median:42.5                       | No. of bone metastasis<br>1/2/3:<br>41%/31%/28%                        |                                                                          | NA                                          |
| Buelens (LoMP trial)             | 2022 | cRP    | 40 | Median (IQR):<br>66 (59-73) | ECOG 0-1:<br>39 (98)<br>ECOG 2-4:<br>1 (2.5) | cT1-2: 12 (30)<br>cT3-4: 28 (70)            | 1-3/ 6(15)<br>4-5/ 34 (85)                | Median (IQR):<br>19.6 (11.2-45.2) | Low-volume: 32 (80)<br>Median number of bone metastasis (IQR): 2 (1-6) | M1a: 16 (40)<br>M1b: 22 (55)<br>M1c: 2 (5)                               | 17 (43)                                     |
|                                  |      | No cRP | 40 | Median (IQR):<br>76 (69-83) |                                              | ECOG 0-1:<br>33 (83)<br>ECOG 2-3:<br>7 (18) | cT1-2: 7 (18)<br>cT3-4: 33 (83)           | 1-3/ 5(13)<br>4-5/ 35 (83)        | Median (IQR):<br>166 (37.1-592.7)                                      | Low-volume: 14 (35)<br>Number of bone metastasis (median, IQR): 8 (4-18) | M1a: 6 (14)<br>M1b: 23 (58)<br>M1c: 11 (28) |
| Mistretta                        | 2022 | cRP    | 40 | Median (IQR):<br>67 (58-68) | CCI<br><2: 26 (65)<br>>3: 14 (35)            | cT1-2: 20 (50)<br>cT3-4: 20 (50)            | 1-3: 18 (45)<br>4-5: 22 (55)              | Median (IQR):<br>14 (9-29)        | ND                                                                     | M1a: 16 (40)<br>M1b: 24 (60)                                             | ND                                          |
|                                  |      | No cRP | 34 | Median (IQR):<br>64 (60-74) |                                              | CCI<br><2: 16 (47)<br>>3: 18 (53)           | cT1-2: 12 (35)<br>cT3-4: 22 (65)          | 1-3: 9 (26)<br>4-5: 23 (68)       |                                                                        | Median (IQR):<br>87 (35-186)                                             |                                             |
| RCT(Phase1/2) for cRP vs. No cRP |      |        |    |                             |                                              |                                             |                                           |                                   |                                                                        |                                                                          |                                             |

|                           |      |        |    |                                |                           |                              |                                                         |                               |                                                              |                            |     |
|---------------------------|------|--------|----|--------------------------------|---------------------------|------------------------------|---------------------------------------------------------|-------------------------------|--------------------------------------------------------------|----------------------------|-----|
| Sooriakumar an (TRoMbone) | 2022 | cRP    | 25 | Median (IQR): 65.4 (62.5-69.3) | No comorbidities: 21 (84) | cT2c: 3 (12)<br>cT3: 22 (88) | 3+4: 1 (4)<br>4+3: 6 (24)<br>8: 7 (28)<br>9-10: 11 (44) | Median (IQR): 14 (2.7-40)     | Number of bone metastasis (median,IQR)<br>:<br>1.0 (1.0-2.0) | N0: 16 (64)<br>N1: 9 (36)  | All |
|                           |      | No cRP | 25 | Median (IQR): 66 (60.2-71.2)   | No comorbidities: 23 (92) | cT2c: 2 (8)<br>cT3: 23 (92)  | 3+4: 2 (8)<br>4+3: 5 (20)<br>8: 6 (24)<br>9-10: 12 (48) | Median (IQR): 16.5 (8.2-37.5) | Number of bone metastasis (median,IQR)<br>:<br>1.0 (1.0-2.0) | N0: 10 (40)<br>N1: 15 (60) |     |

**Comparative studies between cRP vs. RT**

|         |      |                                      |     |                          |                              |                                             |                               |                           |                |                                       |    |
|---------|------|--------------------------------------|-----|--------------------------|------------------------------|---------------------------------------------|-------------------------------|---------------------------|----------------|---------------------------------------|----|
| Knipper | 2020 | cRP                                  | 78  | Median (IQR): 64 (59-69) | WHO PS 0/1-2: 78(100)/0      | cT1/T2:27(35)/31(40)<br>cT3/T4:16 (20)/0    | <7: 18 (23)<br>8-10: 60 (77)  | Median (IQR): 35 (13-55)  | All low-volume | Bone: 78 (100)<br>Distant LN:0        | ND |
|         |      | STAMPE DE arm H (low volume with RT) | 410 | Median (IQR): 68 (63-73) | WHO PS 0/1-2: 313(76)/97(24) | cT1/T2:6(2)/32(8)<br>cT3/T4:261(66)/94 (24) | <7: 84 (21)<br>8-10: 308 (79) | Median (IQR): 55 (23-138) |                | Bone: 311 (76)<br>Distant LN:149 (36) |    |

**RCT (Phase2) assessing LT (including 85% of cRP) vs. NLT**

|     |      |     |           |                          |    |                                 |                    |                            |    |                                      |         |
|-----|------|-----|-----------|--------------------------|----|---------------------------------|--------------------|----------------------------|----|--------------------------------------|---------|
| Dai | 2022 | LT  | 100 (85)* | Median (IQR): 67 (62-71) | ND | <T2c: 14<br>T3a-b: 72<br>T4: 14 | <7: 14<br>8-10: 86 | Median (IQR): 90 (35-236)  | ND | N1: 37<br>Distant LN: 10<br>Bone: 97 | 63 (74) |
|     |      | NLT | 100       | Median (IQR): 69 (64-73) |    | <T2c: 20<br>T3a-b: 61<br>T4: 19 | <7: 12<br>8-10: 85 | Median (IQR): 102 (49-254) |    | N1: 42<br>Distant LN: 20<br>Bone: 95 | NA      |

**Comparative studies between cRP vs. RT vs. NLT**

|                    |      |     |    |                          |                                        |                                  |                                               |                          |                |                              |         |
|--------------------|------|-----|----|--------------------------|----------------------------------------|----------------------------------|-----------------------------------------------|--------------------------|----------------|------------------------------|---------|
| Lumen (LoMP trial) | 2021 | cRP | 48 | Median (IQR): 64 (59-72) | ECOG 0-1: 47 (98)<br>ECOG 2-3: 1 (2.1) | cT1-2: 17 (35)<br>cT3-4: 31 (65) | 1/2/3/4/5: 1(2.1)/3(6.3)/6(13)/10(21)/28 (58) | Median (IQR): 19 (11-42) | All low-volume | M1a: 23 (48)<br>M1b: 25 (52) | 40 (83) |
|--------------------|------|-----|----|--------------------------|----------------------------------------|----------------------------------|-----------------------------------------------|--------------------------|----------------|------------------------------|---------|



|                                                                        |      |                                         |     |                             |                                        |                                                   |                                                |                                  |                                                                |                              |                                          |
|------------------------------------------------------------------------|------|-----------------------------------------|-----|-----------------------------|----------------------------------------|---------------------------------------------------|------------------------------------------------|----------------------------------|----------------------------------------------------------------|------------------------------|------------------------------------------|
|                                                                        |      | RT                                      | 26  | Median (IQR): 70 (61-76)    | ECOG 0-1: 25 (96)<br>ECOG 2-3: 1 (3.8) | cT1-2: 5 (19)<br>cT3-4: 21 (81)                   | 1/2/3/4/5: 0/1(3.8)/2(7.7)/5(19)/18(69)        | Median (IQR): 40 (15-67)         |                                                                | M1a: 9 (35)<br>M1b: 17 (65)  | 26 (100)                                 |
|                                                                        |      | NLT                                     | 35  | Median (IQR): 74 (69-84)    | ECOG 0-1: 29 (83)<br>ECOG 2-3: 6 (17)  | cT1-2: 4 (11)<br>cT3-4: 31 (89)                   | 1/2/3/4/5: 3(9.4)/2(6.3)/3(9.4)/11(34)/13(41)  | Median (IQR): 47 (17-156)        |                                                                | M1a: 10 (29)<br>M1b: 25 (71) | 30 (86)                                  |
| <b><u>Comparative studies between cRP vs. RP for localized PCa</u></b> |      |                                         |     |                             |                                        |                                                   |                                                |                                  |                                                                |                              |                                          |
| Chaloupka                                                              | 2021 | cRP                                     | 79  | Median (IQR): 66 (60-72)    | ASA score>2: 61%                       | ND                                                | ND                                             | Median (IQR): 21.1 (13-55)       | NA                                                             | NA                           | None                                     |
|                                                                        |      | RP                                      | 332 | Median (IQR): 68 (60-73)    | ASA score>2: 45%                       |                                                   |                                                | Median (IQR): 35 (13-55)         |                                                                |                              |                                          |
| <b><u>Single arm or only including cRP cohort</u></b>                  |      |                                         |     |                             |                                        |                                                   |                                                |                                  |                                                                |                              |                                          |
| Heidenreich                                                            | 2018 | cRP                                     | 113 | Median(range): 60.2 (42-69) | ND                                     | ND                                                | 6/7/8/9/10: 4(3.5)/18(16)/42(37)/40(35)/9(7.9) | Median (range): 8.0 (2.5-390)    | Low-volume: 88 (78)<br>High-volume: 25 (22)                    | ND                           | ADT alone: 69 (61)<br>ADT+DO C: 11 (9.7) |
| Xue                                                                    | 2020 | cRP + MDT                               | 26  | Median(range): 65.5 (54-78) | ND                                     | cT1-2: 5 (19)<br>cT3a: 13 (50)<br>cT3b-4: 8 (31)  | 1/2/3/4/5: 7(27)/6(23)/5(19)/5(19)/3(12)       | Median (range): 35.3 (8.9-213.5) | Number of bone metastasis 1-3: 20 (77)<br>4-5: 6 (23)          | cN0: 20 (77)<br>cN1: 6 (23)  | 5 (8.6%)                                 |
|                                                                        |      | cRP only                                | 32  | Median(range): 67.5 (51-79) |                                        | cT1-2: 5 (16)<br>cT3a: 12 (38)<br>cT3b-4: 15 (47) | 1/2/3/4/5: 10(31)/7(22)/5(16)/6(19)/4(13)      | Median (range): 36.4 (9.7-756.3) | Number of bone metastasis 1-3: 22 (69)<br>4-5: 10 (31)         | cN0: 21 (66)<br>cN1: 11 (34) |                                          |
| Mandel (ProMPT trial)                                                  | 2021 | cRP (assessing CTC as prognostic value) | 33  | ND                          | ND                                     | <cT3a: 16 (49)<br>>cT3a: 17 (52)                  | <5: 20 (61)<br>5: 13 (39)                      | Median (IQR): 29.7 (10.6-54.3)   | Number of bone metastasis 1: 20 (61)<br>2: 9 (27)<br>3: 4 (12) | ND                           | ND                                       |
